# Supplementary material for: Effects of UV/H2O2 degradation on Moringa oleifera Lam. leaves polysaccharides: Composition, in vitro fermentation and prebiotic properties on gut microorganisms
Source: PubMed Central journal article supplement — Food Chem X. 2024 Mar 11;22:101272. doi: 10.1016/j.fochx.2024.101272 (PMC10973784; doi:10.1016/j.fochx.2024.101272), 2024-03-11
Supplement: mmc1.pdf [file mmc1.pdf]

1 **Effects of UV/H<sub>2</sub>O<sub>2</sub> degradation on *Moringa oleifera* Lam. leaves polysaccharides: **composition**, *in vitro* fermentation**  
2 **and prebiotic properties on gut microorganisms**

3  
4 Table S1. The colour changes of MOLP and DMOLP-3.

| Index | Group | 0 h   | 0.5 h | 1.0 h | 1.5 h | 2.0 h | 2.5 h  | 3.0 h |
|-------|-------|-------|-------|-------|-------|-------|--------|-------|
| L*    | MOLP  | 28.76 | -     | -     | -     | -     | -      | -     |
|       | DMOLP | -     | 24.22 | 23.62 | 22.99 | 22.76 | 22.48  | 22.70 |
| a*    | MOLP  | -0.64 | -     | -     | -     | -     | -      | NA    |
|       | DMOLP | NA    | -0.45 | -0.78 | -0.66 | -0.53 | -0.45  | -0.30 |
| b*    | MOLP  | 0.86  | -     | -     | -     | -     | -      | -     |
|       | DMOLP | -     | -0.15 | -0.23 | -0.23 | -0.55 | --0.69 | -1.27 |

5  
6  
7  
8  
9  
10  
11  
12  
13  
14

15  
16

Fig. S1. The Ion current diagram of a single glycosidic bond of DMOLP-3.

Araf-(1→

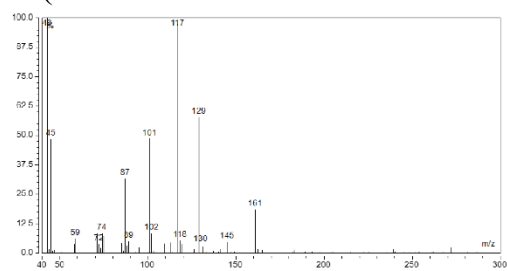

→5)-Araf-(1→

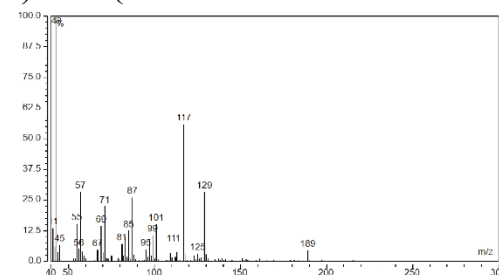

Galp-(1→

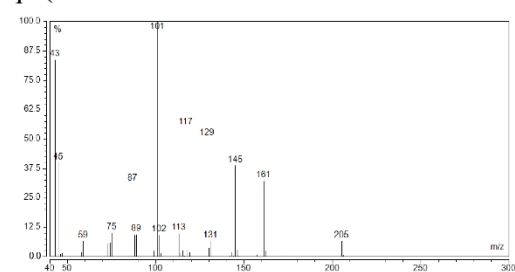

→3,5)-Araf-(1→

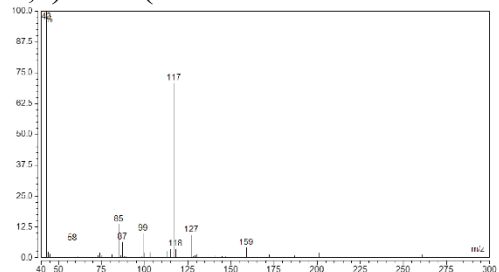

→2,4)-Rhap-(1→

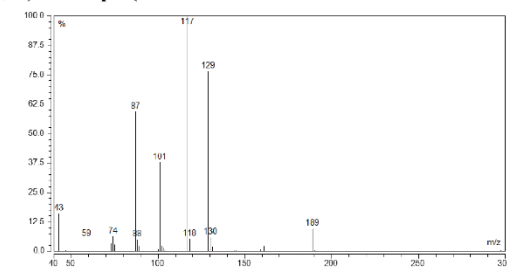

→4)-Galp-(1→

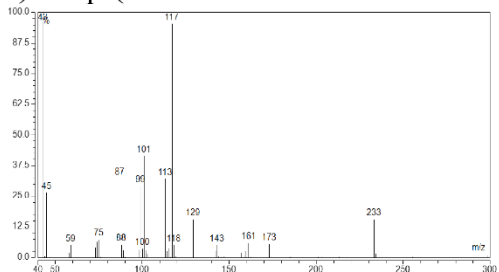

→3)-Galp-(1→

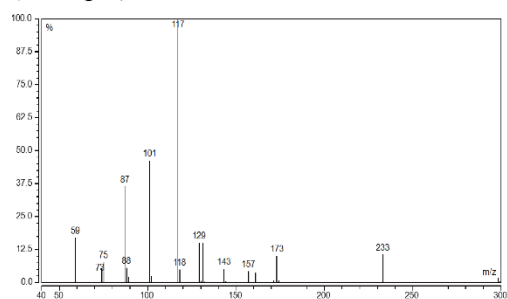

→6)-Galp-(1→

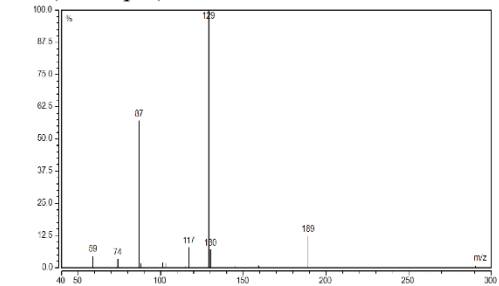

→3,4)-Galp-(1→

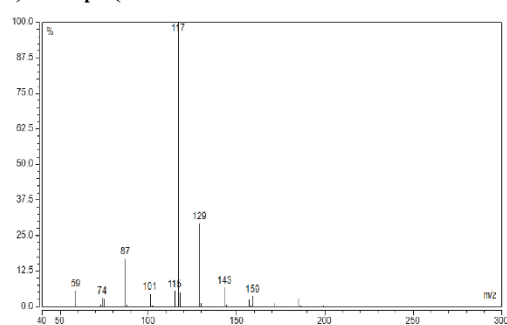

→3,6)-Galp-(1→

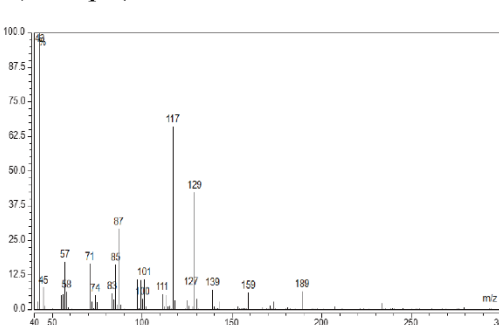

17
